# Supplementary material for: Gene-Expression Signatures Can Distinguish Gastric Cancer Grades and Stages
Source: PLoS One. 2011 Mar 18;6(3):e17819. doi: 10.1371/journal.pone.0017819 (PMC3060867; doi:10.1371/journal.pone.0017819)
Supplement: Table S2 — 99 genes have their expression changes perfectly correlate with the grades WD-MD-PD-UD (|CC| = 1, p-value<0.05). (XLSX) [file pone.0017819.s002.xlsx]

## Sheet: Sheet1
# 99 genes have their expression changes perfectly correlate with the grades WD-MD-PD-UD (|CC|=1, p-value<0.05)
ID	Symbol	G1_WD_Mean	G2_MD_Mean	G3_PD_Mean	G4_UD_Mean	Correlation Coefficient
3553531	TNFAIP2	6.29333	6.44463	6.59408	6.83301	1
3216319	ZNF367	5.23006	5.28343	5.35781	5.51941	1
3986647	VSIG1	6.70188	7.07549	7.30632	7.8904	1
3933550	TFF2	7.25576	7.36339	7.54523	8.05808	1
3332780	PGA4	5.02513	5.82328	6.44406	7.30742	1
3332729	CD5	5.78166	5.82116	5.86106	6.13592	1
3256914	LIPF	7.8657	7.87157	8.12165	8.36954	1
3105600	CA2	5.87841	6.0849	6.17659	6.72556	1
2452754	SLC26A9	4.56326	4.91093	4.93199	5.71049	1
3633699	NRG4	3.19042	3.32816	3.36108	3.59335	1
2487063	GKN1	3.6595	3.9068	4.62193	4.87449	1
3836266	FOSB	6.46813	6.60186	6.78883	6.80831	1
3329206	CREB3L1	6.28031	6.36447	6.36565	6.78675	1
3168066	CA9	6.27768	6.40416	6.53689	7.73093	1
2399743	AKR7A3	6.37532	6.55363	6.60091	6.96957	1
3119200	PSCA	5.518	5.54786	5.7374	5.96149	1
3886765	PI3	7.983	7.33245	7.26777	6.09145	-1
3863214	cdna(scan)	6.3711	5.15841	5.06535	4.55582	-1
3834341	CEACAM5	7.85308	7.21774	6.56241	5.94334	-1
3720228	CRKRS	6.35003	5.90965	5.88616	5.56918	-1
3020343	MET	7.49805	6.38852	5.94681	5.33703	-1
2797393	FAT	7.30855	6.96493	6.86289	6.70352	-1
2463515	CHML	5.03203	4.75624	4.5359	3.86724	-1
2378937	DTL	5.33569	4.87408	4.85589	4.42481	-1
3743551	CLDN7	7.323	7.27447	6.95401	6.65866	-1
3834379	CEACAM6	9.74164	8.24653	7.35748	6.88056	-1
3490892	OLFM4	9.09718	8.38169	7.96322	6.69571	-1
3403414	DPPA3	4.38745	4.2636	4.20688	3.8842	-1
3824874	IFI30	8.45019	8.42515	8.33916	7.59857	-1
3595979	CCNB2	4.37679	4.26867	4.2108	3.7771	-1
2900051	HIST1H3H	6.19127	6.10227	6.09143	6.06995	-1
3958045	C22orf30	6.12155	5.84048	5.6048	5.00221	-1
3910785	AURKA	5.81399	5.60328	5.40769	4.86921	-1
3881443	TPX2	6.47423	5.86232	5.80399	5.10905	-1
3752709	MYO1D	7.77025	7.30987	6.97821	6.92522	-1
3696554	TMED6	3.9501	3.84839	3.68913	3.61695	-1
3693673	CNOT1	7.99995	7.64823	7.43933	7.13198	-1
3651672	ANKS4B	5.97226	5.62453	5.21348	5.1124	-1
3539724	SYNE2	5.84686	5.81467	5.56239	5.42578	-1
3539070	HIF1A	7.7279	7.66016	7.59917	6.50514	-1
3508330	HSPH1	5.76124	5.57712	5.34899	4.85524	-1
3490655	CKAP2	6.20876	6.17492	5.95299	5.22561	-1
3485074	RFC3	5.46005	5.14367	4.87738	4.44449	-1
3445544	FLJ22662	7.32965	7.22198	6.86892	6.34603	-1
3432514	OAS2	6.70189	6.45585	6.30189	5.89962	-1
3421177	NUP107	5.32534	5.10514	4.89822	4.48821	-1
3388807	MMP1	8.01193	7.29405	7.12908	5.81855	-1
3108489	LAPTM4B	7.84173	7.63075	7.44227	6.65956	-1
2997376	ANLN	5.83473	5.49981	5.38992	4.77279	-1
2974935	SLC2A12	4.10032	3.95763	3.77989	3.46577	-1
2951674	SRPK1	6.91164	6.2177	6.19076	5.76894	-1
2941972	C6orf105	4.89995	4.53186	4.50935	4.02499	-1
2853768	NUP155	6.10841	6.09012	5.85582	5.32506	-1
2813414	CCNB1	7.05118	6.67072	6.59532	6.06816	-1
2809245	ITGA2	7.16541	6.52914	6.27676	5.42008	-1
2710599	CLDN1	7.37094	7.13034	6.54057	5.234	-1
2692883	MUC13	9.32159	8.59843	7.96825	7.93594	-1
2652675	ECT2	5.61371	5.51447	5.20743	4.42272	-1
2471316	GEN1	4.80657	4.69689	4.48872	4.32915	-1
2376548	MFSD4	5.79034	5.59351	5.55359	5.42692	-1
2371139	LAMC2	6.9735	6.82799	6.4372	5.81429	-1
2530713	CCL20	5.5379	4.9668	4.68438	4.44439	-1
3904747	RBL1	5.59992	5.42358	5.32051	4.80978	-1
3388673	MMP7	7.00328	6.97006	6.2683	5.82901	-1
3351200	TMPRSS4	6.13065	6.10821	5.57022	5.34597	-1
3150455	TNFRSF11B	4.48587	4.32492	4.17303	3.96316	-1
2731381	CXCL1	8.52191	8.46667	7.9537	7.55932	-1
3653072	PLK1	6.69536	6.66507	6.57698	6.42975	-1
3639031	PRC1	5.43532	5.30345	5.2876	5.06256	-1
3259703	C10orf12	4.95891	4.87704	4.65459	4.62173	-1
2947077	HIST1H3I	9.74807	9.46487	9.32153	8.36719	-1
2947073	HIST1H1B	7.8188	7.63329	7.37395	7.01553	-1
2902326	cdna(scan)	7.06404	7.04363	6.77607	6.69727	-1
2830861	EGR1	7.9821	7.86427	7.84557	7.42462	-1
2806517	SKP2	6.20392	5.94618	5.66341	5.60031	-1
3944243	APOL6	6.23113	6.18859	6.17994	5.71224	-1
3758510	ETV4	6.47994	6.16317	6.00064	5.93535	-1
3724197	NSF	6.93373	6.59357	6.51185	6.21989	-1
3667281	SF3B3	7.52489	7.15108	7.14046	6.68944	-1
3565663	DLG7	4.54183	4.22514	4.22002	3.64646	-1
3402571	NCAPD2	7.26774	6.83767	6.78794	6.31505	-1
3374746	PATL1	6.87843	6.46949	6.39057	5.97556	-1
3220977	ROD1	8.44318	8.09593	7.98393	7.39944	-1
3151534	ATAD2	4.93931	4.89131	4.71674	4.32636	-1
3137875	GGH	5.53906	5.13244	5.09062	4.60957	-1
2946215	HIST1H3B	9.21495	8.75984	8.73982	7.43638	-1
2436754	ADAR	7.77199	7.61144	7.5506	7.09121	-1
2379863	CENPF	4.78734	4.47734	4.45757	3.95832	-1
3962338	TCF20	7.39044	7.16716	7.04757	6.85154	-1
3167110	ANXA2P2	10.1275	9.96094	9.91505	9.0888	-1
3331903	FAM111B	5.1472	4.58762	4.49652	4.47816	-1
3326252	NAT10	6.10414	5.84267	5.72382	5.68498	-1
3593575	SLC27A2	5.31064	4.64218	4.62979	4.44933	-1
2583254	LY75	5.56525	5.20344	5.17621	4.91794	-1
3607537	FANCI	5.14791	5.11013	4.9576	4.70427	-1
3565571	WDHD1	4.60153	4.44866	4.37127	4.04656	-1
3134034	PRKDC	7.07251	7.06266	6.87012	6.44753	-1
2570350	FLJ38359	5.42784	5.32511	4.86533	4.8202	-1
2494484	NCAPH	5.39131	5.2366	5.08689	4.89797	-1
