# Supplementary material for: Gene-Expression Signatures Can Distinguish Gastric Cancer Grades and Stages
Source: PLoS One. 2011 Mar 18;6(3):e17819. doi: 10.1371/journal.pone.0017819 (PMC3060867; doi:10.1371/journal.pone.0017819)
Supplement: Table S3 — List of the gene names of the 198-gene signature, among which 39 are grade-correlated gene. CC: Correlation Coefficient. (XLSX) [file pone.0017819.s003.xlsx]

## Sheet: Sheet1
# 39 genes whose expressions are correlated with grades G1-G2-G3-G4
# "1" represents a increased expression along grades G1 to G4; "-1" represents a decreased trend
Gene Symbol	Correlation Coefficient						198-gene signature
AKR7A3	1						AKR7A3
GKN1	1						GKN1
SLC26A9	1						SLC26A9
LIPF	1						LIPF
ZNF367	1						ZNF367
CREB3L1	1						CREB3L1
CA9	1						CA9
FOSB	1						FOSB
NRG4	1						NRG4
FAT	-1						SULT1C2
LAMC2	-1						MAL
CCNB1	-1						DPCR1
ITGA2	-1						GKN2
SKP2	-1						ESRRG
NCAPH	-1						MYOC
GEN1	-1						CAPN9
ADAR	-1						ADH7
HIST1H3H	-1						CXCL9
LY75	-1						GHRL
CCL20	-1						C9orf96
CHML	-1						FAM19A4
NUP155	-1						ASAH3L
EGR1	-1						HIST1H2BB
FLJ38359	-1						FBP2
CENPF	-1						C9orf64
ECT2	-1						AQP4
DTL	-1						ADIPOQ
CXCL1	-1						cdna(scan)
MFSD4	-1						cdna(scan)
C10orf12	-1						cdna(scan)
ROD1	-1						CKMT2
OLFM4	-1						CPS1
CKAP2	-1						CHI3L1
TNFRSF11B	-1						GPRIN3
C6orf105	-1						ANXA10
CLDN1	-1						IGJ
MUC13	-1						CEL
CRKRS	-1						POPDC3
TMED6	-1						ABHD9
							GADD45B
							CFD
							IL1R2
							SLC9A2
							NOC2L
							C1QTNF7
							AKR1C2
							FAM84B
							NR0B2
							AMPD1
							CLDN18
							C2orf40
							MARS2
							BTG2
							F2R
							SLC5A6
							DPT
							KCNMB1
							FAP
							ANGPTL1
							LIFR
							C1QTNF3
							FGA
							GPR155
							SEMA5A
							FRZB
							SLC9A3
							LOC25845
							FGF2
							COL5A2
							MEP1A
							FAM107A
							ITGA8
							CACNB2
							ALDOB
							KLF9
							CXCL12
							TMOD1
							MAMDC2
							PGM5
							AOC3
							CDC6
							TNS1
							SMYD1
							SCN7A
							MEIS1
							IL17RB
							DUSP1
							DNAJB5
							DES
							COL6A3
							COL3A1
							C7
							ACTG2
							PRUNE2
							PRUNE2
							ASB5
							JUN
							RGS2
							MAP1B
							FAM129A
							CASQ2
							SPARC
							HPGD
							LMOD1
							HIST1H4A
							CAP2
							GFRA3
							PDLIM3
							GCNT4
							VCAN
							LMNB1
							SPARCL1
							CPE
							SPP1
							CCL21
							BNC2
							PI16
							C2
							GPR128
							ASAH2
							TNC
							ABI3BP
							SVIL
							ASPN
							OGN
							TPM2
							CDH17
							FABP4
							SMOC2
							SST
							MYLK
							CCDC80
							FUT3
							CNN1
							ICAM1
							OR1M1
							ACLY
							PRELP
							SFRP4
							VIL1
							HIATL1
							CDCA7
							HIST1H2BM
							PNPT1
							HIST1H3C
							EXO1
							F2RL2
							CSRP1
							HIST1H2BF
							CCNA2
							ADH1C
							SULT1B1
							STAT1
							CCKAR
							TFRC
							PARP14
							IL8
							PBLD
							C10orf81
							C9orf163
							NEDD1
							PRPF4
							MELK
							RSPO2
							MYO6
							TM4SF1
							NUSAP1
							DMBT1
							FAT
							LAMC2
							CCNB1
							ITGA2
							SKP2
							NCAPH
							GEN1
							ADAR
							HIST1H3H
							LY75
							CCL20
							CHML
							NUP155
							EGR1
							FLJ38359
							CENPF
							ECT2
							DTL
							CXCL1
							MFSD4
							C10orf12
							ROD1
							OLFM4
							CKAP2
							TNFRSF11B
							C6orf105
							CLDN1
							MUC13
							CRKRS
							TMED6
