# Supplementary material for: Gene-Expression Signatures Can Distinguish Gastric Cancer Grades and Stages
Source: PLoS One. 2011 Mar 18;6(3):e17819. doi: 10.1371/journal.pone.0017819 (PMC3060867; doi:10.1371/journal.pone.0017819)
Supplement: Table S4 — List of 40 signature genes that are found specifically for the WD group; 18, 20 and 255 genes are specific to the MD, PD and UD group, respectively. (XLSX) [file pone.0017819.s004.xlsx]

## Sheet: Sheet1
# List of 40 signature genes that are found specifically for the WD group; 18, 20 and 255 genes are specific to the MD, PD and UD group, respectively
# the value represent the AUC for each group
gene_id	Symbol	WD	MD	PD	UD
2863363	F2RL2	0.651515
3406880	PIK3C2G	0.732
3351200	TMPRSS4	0.681818
3997825	MXRA5	0.611742
2991860	ITGB8	0.741477
2652675	ECT2	0.738636
2974935	SLC2A12	0.771
2371139	LAMC2	0.700758
3108489	LAPTM4B	0.760417
2809245	ITGA2	0.732008
2882098	SPARC	0.619318
3824874	IFI30	0.639205
3834341	CEACAM5	0.660038
3445544	FLJ22662	0.689394
3758510	ETV4	0.787879
3943234	SLC5A1	0.746
3919278	CLIC6	0.779
3629103	KIAA0101	0.549242
2700365	TM4SF1	0.737689
2494484	NCAPH	0.674242
3868681	KLK1	0.726
3911217	TMEPAI	0.700758
2946364	HIST1H3F	0.791
2909263	MEP1A	0.738636
3750369	NOS2A	0.760417
3653072	PLK1	0.6875
3976450	SPACA5	0.754
3847486	FUT3	0.698
2772805	GC	0.701
2553970	PNPT1	0.716856
3150455	TNFRSF11B	0.731061
3595315	CGNL1	0.739583
3137875	GGH	0.737689
3167110	ANXA2P2	0.785985
3020343	MET	0.839015
2656818	ADIPOQ	0.738636
3508330	HSPH1	0.737689
2692883	MUC13	0.760417
3863214	cdna(scan)	0.756629
2899206	HIST1H2BF	0.605114
2899102	HIST1H3C				0.732
2886679	KCNMB1				0.888
2887309	DUSP1				0.572
2678448	FAM107A				0.837
3020302	CAV1				0.884
4053085	PRELP				0.757
3869847	ZNF468				0.609
2905296	PI16				0.754
2463515	CHML				0.5
3958045	C22orf30				0.641
3564919	FERMT2				0.866
4054204	APOD				0.884
3558375	GZMB				0.822
2527814	VIL1				0.721
2777639	GPRIN3				0.902
3662139	MT1E				0.928
2372858	RGS2				0.848
3597338	TPM1				0.873
3724197	NSF				0.63
2847967	SEMA5A				0.808
2951674	SRPK1				0.565
3332729	CD5				0.913
3710823	MYOCD				0.768
3200040	BNC2				0.859
3526425	PCID2				0.649
3049292	IGFBP3				0.822
2344888	CYR61				0.736
2639054	PARP14				0.58
3944243	APOL6				0.5
2947073	HIST1H1B				0.75
3593575	SLC27A2				0.692
2705748	AADACL1				0.67
2624565	IL17RB				0.902
2692447	MYLK				0.728
2926802	MYB				0.775
2794704	ASB5				0.645
2686458	ABI3BP				0.725
2807716	C7				0.931
3722195	AOC3				0.851
3382015	CHRDL2				0.554
2779271	ADH1C				0.804
3853178	ABHD9				0.946
3237396	CACNB2				0.946
2447877	FAM129A				0.808
2516023	CDCA7				0.739
3144760	RBM12B				0.587
3751625	SSH2				0.565
3415229	NR4A1				0.601
2900051	HIST1H3H				0.772
3748798	MFAP4				0.754
3331903	FAM111B				0.728
3819870	OR1M1				0.663
3821263	CNN1				0.775
3299504	ACTA2				0.902
3772279	SOCS3				0.54
2378937	DTL				0.688
3699044	RFWD3				0.783
3300115	PPP1R3C				0.902
3666146	SLC7A6				0.87
2576526	NOC2L				0.594
2853768	NUP155				0.58
3301263	SORBS1				0.851
3013498	ASB4				0.884
3617719	ACTC1				0.507
3361041	TPP1				0.819
3212277	C9orf64				0.717
2489007	ACTG2				0.819
3667281	SF3B3				0.692
2570350	FLJ38359				0.743
3752709	MYO1D				0.612
3862640	SERTAD1				0.746
2750627	CPE				0.862
3292946	TACR2				0.663
3489851	FAM10A4				0.721
3350830	TAGLN				0.775
3544525	FOS				0.554
3415744	IGFBP6				0.761
3763390	TMEM100				0.949
3539724	SYNE2				0.554
2592268	STAT1				0.79
3757329	JUP				0.692
3455865	KRT4				0.935
3445820	RERG				0.841
3651672	ANKS4B				0.663
3737274	KIAA1618				0.848
3662106	MT1A				0.786
3682028	MYH11				0.841
3167660	DNAJB5				0.87
2498274	C2orf40				0.844
2436754	ADAR				0.71
3456840	PPP1R1A				0.913
4007899	SYP				0.775
2923270	PLN				0.942
4027176	FLNA				0.703
3422144	LGR5				0.873
3402571	NCAPD2				0.739
3689880	SHCBP1				0.558
3192693	CEL				0.946
2937144	SMOC2				0.804
2911372	BAG2				0.761
2712632	TFRC				0.67
2877355	GFRA3				0.808
2451043	LMOD1				0.899
3132782	SFRP1				0.866
3358950	CTSD				0.935
3948640	FBLN1				0.714
3737338	RNF213				0.855
3445741	MGP				0.855
3113352	COL14A1				0.862
3474450	PLA2G1B				0.612
3329206	CREB3L1				0.761
2583254	LY75				0.623
2492753	SMYD1				0.906
3210616	PRUNE2				0.71
2830861	EGR1				0.525
2796951	PDLIM3				0.891
3180263	HIATL1				0.612
2896888	CAP2				0.833
3173508	PGM5				0.935
3693673	CNOT1				0.612
3962338	TCF20				0.717
2742109	FGF2				0.775
3130850	RNF122				0.772
3885464	TOP1				0.783
3407453	PDE3A				0.772
3859946	HSPB6				0.728
3560673	CFL2				0.866
3013255	PEG10				0.946
3296046	KCNMA1				0.793
3204721	TPM2				0.707
3380697	DHCR7				0.848
3321361	SPON1				0.844
2784113	CCNA2				0.815
3764399	RNF43				0.779
3403414	DPPA3				0.844
3610982	DMN				0.808
3216319	ZNF367				0.92
3791254	TNFRSF11A				0.783
3657367	ZNF267				0.587
3904747	RBL1				0.67
2681044	FAM19A4				0.507
3446919	ABCC9				0.931
2797393	FAT				0.583
3775842	TYMS				0.928
2960872	C6orf150				0.725
2902326	cdna(scan)				0.732
3565571	WDHD1				0.764
2479350	cdna(scan)				0.88
3816509	GADD45B				0.656
2530713	CCL20				0.793
3374746	PATL1				0.728
3901361	CST1				0.924
3220977	ROD1				0.587
3208995	KLF9				0.855
3643396	MSLN				0.895
3985717	PLP1				0.844
3056292	CLDN3				0.88
2902804	C2				0.779
3432514	OAS2				0.663
3757433	ACLY				0.808
3204301	CCL21				0.688
3427352	NEDD1				0.757
3639031	PRC1				0.761
2899095	HIST1H4A				0.75
2364231	DDR2				0.793
3672489	IRF8				0.736
3853658	CYP4F11				0.761
2496907	IL1R2				0.761
3984907	ARMCX1				0.841
2946232	HIST1H1C				0.623
3420151	MSRB3				0.891
3279313	ITGA8				0.772
2486178	MEIS1				0.917
3021158	C7orf58				0.83
4048241	HLA-DRB5				0.931
3354799	CHEK1				0.707
3023149	FLNC				0.808
3142381	FABP4				0.942
3919033	SLC5A3				0.58
3945545	APOBEC3B				0.652
2521556	MARS2				0.888
3553531	TNFAIP2				0.736
3308489	KIAA1598				0.601
2388219	EXO1				0.721
3955070	GSTTP1				0.837
2773947	CXCL9				0.692
4018080	CHRDL1				0.826
2719440	C1QTNF7				0.783
3214800	OGN				0.906
3662247	MT1X				0.938
2961347	FILIP1				0.928
3510362	C13orf23				0.623
3982612	GPR174				0.627
3552344	FLJ41170				0.681
3517251	DACH1				0.75
3883921	MYL9				0.873
3595979	CCNB2				0.743
2827185	LMNB1				0.848
3411721	CNTN1				0.895
3194395	C9orf163				0.656
2599153	TNS1				0.826
3140478	RPESP				0.837
3324447	FIBIN				0.884
3434012	HSPB8				0.761
3222170	TNC				0.772
3326252	NAT10				0.88
2367154	BAT2D1				0.685
3181240	TMOD1				0.884
2777113	SPARCL1				0.924
3629243	RBPMS2				0.801
3192912	C9orf96				0.54
2633737	GPR128				0.826
3565663	DLG7				0.605
2450865	CSRP1				0.833
3902743	C20orf112				0.663
3409605	MLSTD1				0.725
3511698	EPSTI1				0.79
2946225	HIST1H2BB				0.779
2379863	CENPF				0.696
2362511	DARC				0.764
3259703	C10orf12				0.667
3927446	ADAMTS1				0.826
2415084	JUN				0.583
3820443	ICAM1				0.656
3152558	FAM84B				0.975
2358693	MLLT11				0.815
2525989	CPS1				0.775
2445982	ANGPTL1				0.913
3104489	STMN2				0.667
2914070	MYO6				0.612
2471316	GEN1				0.609
2955691	RCAN2				0.862
2585476	SCN7A				0.975
3421177	NUP107				0.562
3185558	PRPF4				0.692
3395464	ASAM				0.797
3755976	MED24				0.859
2545549	SLC5A6				0.964
2947095	HIST1H3J				0.808
3507710	SLC7A1				0.721
3168508	MELK				0.725
3210497	PRUNE2				0.804
3836266	FOSB				0.562
2814756	MAP1B				0.899
3720228	CRKRS				0.645
3286602	CXCL12				0.804
3371719	CKAP5				0.562
3148545	RSPO2				0.638
2590715	FRZB				0.507
3282974	SVIL				0.793
2852766	C1QTNF3				0.938
2528476	DES				0.826
2688813	CCDC80				0.862
3865275	CKM				0.783
3539070	HIF1A				0.576
2751009	ANXA10			0.637
3039671	SOSTDC1			0.629
2591643	COL5A2			0.777
2498911	SULT1C2			0.62
3214845	ASPN			0.683
3374890	TCN1			0.698
2350489	KIAA1324			0.672
3986647	VSIG1			0.634
4037778	DMBT1			0.678
2946215	HIST1H3B			0.698
2967276	POPDC3			0.65
2644418	CLDN18			0.67
2497252	SLC9A2			0.683
2902089	DPCR1			0.67
3274758	AKR1C2			0.674
3662130	MT1L			0.62
3622176	DUOX2			0.652
2947081	HIST1H4L			0.722
3168066	CA9			0.701
2584134	FAP			0.751
3910360	BCAS1		0.663
2845362	SLC9A3		0.691
3414739	METTL7A		0.683
3289189	ASAH2		0.692
3973891	SYTL5		0.652
2772566	IGJ		0.438
2845351	LOC25845		0.707
2941972	C6orf105		0.62
2818035	CKMT2		0.776
2429235	AMPD1		0.605
3218077	ALDOB		0.562
3164312	ASAH3L		0.638
3921992	FAM3B		0.661
3648391	TNFRSF17		0.62
3360401	HBB		0.617
3292590	PBLD		0.562
3862188	FCGBP		0.663
2402883	NR0B2		0.652
